# Supplementary material
Source: PubMed Central journal article supplement (PMC7474925)
Supplement: NIHMS1622231-supplement-Supp_Table_1.pdf [file NIHMS1622231-supplement-Supp_Table_1.pdf]

**Supplemental Table 1. Between Group Analysis of Variance for All Personality Subscales.**

| Table 1                                 |          |          |                |                |                |                 |                  |
|-----------------------------------------|----------|----------|----------------|----------------|----------------|-----------------|------------------|
| <i>Personality Subscale Differences</i> |          |          |                |                |                |                 |                  |
| Subscale                                | <i>F</i> | <i>p</i> | <u>Control</u> | <u>sBinge</u>  | <u>eBinge</u>  | <u>MJ+Binge</u> | <u>MJ+eBinge</u> |
|                                         |          |          | <i>M (SD)</i>  |                |                |                 |                  |
| <u>BIS-11</u>                           |          |          |                |                |                |                 |                  |
| Motor                                   | 6.94     | .0001    | 20<br>(3.34)   | 21.7<br>(3.39) | 23.3<br>(3.49) | 23.1<br>(4.14)  | 23.5<br>(3.82)   |
| Attentional                             | 2.15     | 0.0754   | 15.2<br>(3.69) | 15.3<br>(3.85) | 15.8<br>(3.72) | 16.8<br>(4.32)  | 17.5<br>(4.69)   |
| Nonplanning                             | 6.16     | 0.0001   | 19.9<br>(3.97) | 22<br>(4.31)   | 23.2<br>(4.69) | 24.1<br>(5.13)  | 24.5<br>(4.81)   |
| <u>SSS</u>                              |          |          |                |                |                |                 |                  |
| Boredom Susceptibility                  | 3.34     | 0.0111   | 2.2<br>(1.57)  | 2.69<br>(1.89) | 2.85<br>(1.79) | 3.11<br>(1.91)  | 3.88<br>(2.44)   |
| Disinhibition <sup>1</sup>              | 17.21    | 0.0001   | 2.55<br>(1.68) | 3.74<br>(1.54) | 4.29<br>(1.53) | 5.17<br>(1.38)  | 4.8<br>(1.26)    |
| Experience Seeking <sup>1</sup>         | 3.23     | 0.0135   | 4.35<br>(1.59) | 4.35<br>(1.34) | 5.07<br>(1.52) | 5.29<br>(2.09)  | 4.96<br>(1.62)   |
| Thrill Adventure Seeking                | 5.74     | 0.0002   | 6.85<br>(2.68) | 7.23<br>(2.32) | 8.73<br>(1.81) | 8.23<br>(1.91)  | 7.48<br>(2.65)   |

*Note:* MJ = Marijuana. sBinge = Standard Binge. eBinge = Extreme Binge. BIS-11 = Barratt Impulsivity Scale 11. SSS = Sensation Seeking Scale.  
<sup>1</sup>Substance use items removed
