# Supplementary material
Source: PubMed Central journal article supplement (PMC7474925)
Supplement: NIHMS1622231-supplement-Supp_Table_2.pdf [file NIHMS1622231-supplement-Supp_Table_2.pdf]

**Supplemental Table 2: Logistic Regression for All Personality Subscales.**

---

Table 2

*Logistic Regression Predicting Substance-Use Group*

---

| Subscale                        | Wald Chi-Square | Pr > Chi-Square |
|---------------------------------|-----------------|-----------------|
| <u>BIS-11</u>                   |                 |                 |
| Motor                           | 5.41            | 0.2480          |
| Attentional                     | 6.58            | 0.1599          |
| Nonplanning                     | 8.68            | 0.0695          |
| <u>SSS</u>                      |                 |                 |
| Boredom Susceptibility          | 3.63            | 0.4583          |
| Disinhibition <sup>1</sup>      | 24.4            | <.0001          |
| Experience Seeking <sup>1</sup> | 3.87            | 0.4243          |
| Thrill Adventure Seeking        | 11.6            | 0.0205          |

---

*Note:* BIS-11 = Barratt Impulsivity Scale 11. SSS = Sensation Seeking Scale.

<sup>1</sup>Substance use items removed.

---
