# Supplementary material
Source: PubMed Central journal article supplement (PMC7474925)
Supplement: NIHMS1622231-supplement-Supp_Table_3.pdf [file NIHMS1622231-supplement-Supp_Table_3.pdf]

**Supplemental Table 3. Effect Sizes for Table 2 in the Main Document.**

Table 3

*Between Group Effect Sizes*

| Subscale                            | Noncentrality Parameter |           |                     | Total Variation Accounted For |            |                     |
|-------------------------------------|-------------------------|-----------|---------------------|-------------------------------|------------|---------------------|
|                                     | MVUE                    | Low MSE E | 95% CI <sup>2</sup> | $\eta^2$                      | $\Omega^2$ | 95% CI <sup>2</sup> |
| BIS-11<br>Nonplanning               | 20.4                    | 20.2      | 6.3 - 45            | 0.1023                        | 0.0854     | 0.0278 - 0.169      |
| SSS Thrill and<br>Adventure Seeking | 18.7                    | 18.6      | 5.4 - 43            | 0.0960                        | 0.0790     | 0.0238 - 0.162      |

*Note:* BIS-11 = Barratt Impulsivity Scale 11. SSS = Sensation Seeking Scale. CI = Confidence Interval. MVUE = Minimum variance unbiased estimate. Low MSE E = (Slightly biased) noncentrality estimate with lower total mean square error.  $\eta^2$  = Eta-Squared, conventional definition of variance explained: SS(predictor variable)/SS(total).  $\Omega^2$  = Omega-Squared, adjusted, unbiased estimate of variance explained.

<sup>1</sup>Confidence interval for Low MSE E

<sup>2</sup>Confidence interval for  $\eta^2$

Effect size estimates provided by the EFFECTSIZE model option of SAS proc GLM. See SAS documentation for SAS/STAT 14.1 for further details.
